# Supplementary material
Source: PubMed Central journal article supplement (PMC5479115)
Supplement: mmc2.pdf [file mmc2.pdf]

# Kinesin Processivity Is Determined by a Kinetic Race from a Vulnerable One-Head-Bound State

Keith J. Mickolajczyk<sup>1,2</sup> and William O. Hancock<sup>1,2,\*</sup>

<sup>1</sup>Department of Biomedical Engineering and <sup>2</sup>Intercollege Graduate Degree Program in Bioengineering, Penn State University, University Park, Pennsylvania

**ABSTRACT** Kinesin processivity, defined as the average number of steps that occur per interaction with a microtubule, is an important biophysical determinant of the motor's intracellular capabilities. Despite its fundamental importance to the diversity of tasks that kinesins carry out in cells, no existing quantitative model fully explains how structural differences between kinesins alter kinetic rates in the ATPase cycle to produce functional changes in processivity. Here we use high-resolution single-molecule microscopy to directly observe the stepping behavior of kinesin-1 and -2 family motors with different length neck-linker domains. We characterize a one-head-bound posthydrolysis vulnerable state where a kinetic race occurs between attachment of the tethered head to its next binding site and detachment of the bound head from the microtubule. We find that greater processivity is correlated with faster attachment of the tethered head from this vulnerable state. In compliment, we show that slowing detachment from this vulnerable state by strengthening motor-microtubule electrostatic interactions also increases processivity. Furthermore, we provide evidence that attachment of the tethered head is irreversible, suggesting a first passage model for exit from the vulnerable state. Overall, our results provide a kinetic framework for explaining kinesin processivity and for mapping structural differences to functional differences in diverse kinesin isoforms.

## INTRODUCTION

Kinesin motor proteins drive many active processes in the cell, including vesicle transport (1–3), DNA and organelle repositioning (4,5), intraflagellar transport (6,7), microtubule dynamics control (8–10), and mitotic spindle organization (11–13). There are 45 kinesin genes in the human genome, each of which encodes an isoform that is optimized to drive some processes, but is incapable of driving others (14,15). Understanding the nature of this functional specialization is critical to elucidating the molecular bases of Charcot-Marie-Tooth disease (16), hereditary spastic paraplegia (17,18), Alzheimer's disease (19,20), and the various cancers (21,22) associated with either kinesin dysfunction or overactivity. Part of kinesin's functional diversity can be understood by major structural differences between isoforms. For example, kinesin-5 acts as a tetramer instead of the typical dimer (23), and kinesin-14 has its motor domain at its C-terminus rather than its N-terminus (24). However, most kinesins have a similar structure, and their functional specialization thus comes from the tuning of motility parameters such as velocity, processivity, and force sensi-

tivity. Here we focus on processivity, or the number of steps kinesin takes per interaction with a microtubule. Processivity values for different kinesins vary over multiple orders of magnitude from just a few steps (25) to a thousand steps or higher (26,27), in part enabling them to perform their different tasks in the cell. Despite its fundamental importance, a consensus quantitative model that explains how processivity is tuned between kinesin isoforms is absent from the literature. This is in part due to the inability to measure kinetic intermediates in the ATPase cycle from which processivity can be controlled. Here we apply new high-resolution tracking technology (25,28–31) to fill this gap in the literature.

The simplest model for kinesin processivity is the kinetic race model, which posits that kinesin must proceed through a single vulnerable state each turnover of its ATPase cycle (32). In our previous work, we identified a one-head-bound posthydrolysis state as a candidate for the vulnerable state (28,33). This result suggested that processivity could be controlled by a kinetic race between tethered head attachment and bound head detachment from the one-head-bound intermediate. In this study, we examine these rate constants with high-resolution single-molecule microscopy as we implement four methods to alter processivity: changing the motor domain from kinesin-1 to -2, altering

Submitted March 10, 2017, and accepted for publication May 9, 2017.

\*Correspondence: [wohbio@engr.psu.edu](mailto:wohbio@engr.psu.edu)

Editor: Steven Rosenfeld.

<http://dx.doi.org/10.1016/j.bpj.2017.05.007>

© 2017 Biophysical Society.

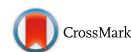

the neck-linker (NL) length, changing the solvent ionic strength, and using slowly dissociating ATP analogs. We find that any method for increasing processivity leads to either the tethered head finding the next microtubule binding site more quickly or the bound head dissociating from the current microtubule binding site more slowly. Thus, we find that the kinetic race model is sufficient for quantitatively explaining processivity under physiological conditions, and that the intracellular capabilities of a given motor in part stem from the tuning of the two rate constants in the race.

## MATERIALS AND METHODS

### Constructs and protein preparation

All kinesin proteins used were expressed in BL21(DE3) bacteria (New England Biolabs, Ipswich, MA) with a C-terminal 6× His tag and purified by affinity chromatography followed by buffer exchange as reported in Mickolajczyk et al. (28) and Chen et al. (34). The kinesin-1 construct used was *Drosophila* KHC truncated at amino acid (aa) 559, and the elongated NL K1<sub>17</sub> construct was made by adding the 3-aa DAL at position 345 just preceding  $\alpha 7$ , consistent with previous works (35–37). The kinesin-2 construct used was human KIF3A motor and NL homodimerized using the kinesin-1 coiled-coil (345–559) (36), and the K2<sub>14</sub> construct was made by deleting the DAL sequence at the end of the NL and replacing the kinked proline at position 355 with an alanine (36). The GFP constructs included a C-terminal eGFP directly preceding the His tag (36–38). The N-terminal avi-tag constructs were described in Mickolajczyk et al. (28). For the kinesin-1 and -2 constructs, the linkers GG and GGAGG, respectively, were added directly downstream of the avi-tag. Biotin was added after induction, typically 0.5–2 h before cell lysis to empirically control the degree of biotinylation of the homodimers. Biotinylation was quantified by comparing the biotin concentration as measured by the colorimetric HABA assay (Sigma-Aldrich, St. Louis, MO) to total protein concentration as indicated by absorbance at 280 nm, and all motors prepared had <0.2 mol of bound biotin per mole of dimer motor. Kinesins used for biochemical assays were truncated at position 406 rather than 560 to enable higher yields (28,34). Insertions and deletions were made either using Q5 or Gibson Assembly (New England Biolabs).

### Single-molecule experiments

Gold nanoparticles were imaged using a custom-built total internal reflection dark field microscope, employing a Sapphire-LP 532 nm laser (5–10 mW at sample; Coherent, Bloomfield, CT). Images were recorded using a Basler Ace acA640-750um CMOS camera (1000 frames per s, 945  $\mu$ s exposure; Basler, Ahrensburg, Germany) accessed by custom LabVIEW software (National Instruments, Cos Cob, CT). Microtubules were adhered to cleaned coverslips as in Mickolajczyk et al. (28). All assays, unless otherwise noted, were carried out in imaging solution: 0.5 mg/mL casein, 10  $\mu$ M taxol, 20 mM glucose, 20  $\mu$ g/mL glucose oxidase, 8  $\mu$ g/mL catalase, 0.2 mg/mL BSA, 1:200  $\beta$ -mercaptoethanol, and 2 mM MgATP in BRB80 (80 mM K-PIPES, 1 mM EGTA, 1 mM MgCl<sub>2</sub>, pH 6.8). Biotinylated motors were incubated with a stoichiometric excess of streptavidin-coated 30-nm gold nanoparticles (BBI Solutions, Cardiff, Wales, UK) on ice for 30 min, then spun down at 20,000 g for 4 min and resuspended at working levels (100–300 pM gold) in imaging solution. Point spread functions were fit using the software FIESTA (39) to obtain ( $X, Y, t$ ) data.

GFP was imaged by total internal reflection fluorescence microscopy using a model No. TE2000 inverted microscope (Nikon, Melville, NY) as in Mickolajczyk et al. (28) and Shastry and Hancock (36,37). Frame rates were set to 3 and 20 frames per s for ATP and ADP experiments, respec-

tively. GFP motors were used at 10–300 pM. ATP movies were analyzed using FIESTA (39), and velocity and run length were determined from the returned distance over time trace. Population run lengths were determined by fitting the cumulative density function (after removing runs <5 pixels, 71 nm/pixel) with an exponential with an  $X$  offset. Mant run lengths were measured in imaging solution with 0.1 mM mantATP. ADP durations were measured manually from kymographs drawn at positions coincident with Cy5-labeled microtubules in the software ImageJ (National Institutes of Health; <http://imagej.nih.gov/ij/>) (34). All experiments were performed at 22–23°C.

### Stopped-flow spectrofluorometry and steady-state biochemistry

ATP half-site experiments were performed on an Applied Photophysics SX20 spectrofluorometer (Applied Photophysics, Leatherhead, Surrey, UK) (34). Data acquisition and fitting were performed in Pro-Data SX software (Applied Photophysics). One syringe was filled with 2–6  $\mu$ M microtubules, 10  $\mu$ M taxol, 500 nM mantADP, and 200–600 nM motor in BRB80 buffer (1:10 molar ratio motor dimer to microtubule). For kinesin-2, 500 nM mantGDP was used instead of mantADP due to the higher affinity of the motor for mantADP (34). The second syringe was filled with 4 mM ATP in BRB80. Excitation was set to 356 nm for the mantADP nucleotide and 450 nm emission was collected using a HQ480SP emission filter (Chroma Technology, Bellows Falls, VT). An integration time of 1 ms was set for the photomultiplier tube. Each experiment contained 1200  $\mu$ L split into 60  $\mu$ L shots, and the ensemble average fluorescence transient generated upon mixing was fit with a double exponential in the range of 1–500 ms. The faster rate constant was reported. The experiment was repeated at least nine times for each motor, and data sets were taken on at least two separate days for each motor. Solution exchange of cold versus mantADP to determine relative affinity was done as previously (34). ATPase experiments were carried out as in Chen et al. (34) with 5–10 nM motor. ATP turnover rates were determined from the Michaelis-Menton fit to the microtubule dependence of the observed reaction rate, corrected for initial kinesin concentration as determined by mant-ADP exchange (25). All experiments were performed at 22–23°C.

For details on the Hidden Markov Model, two-dimensional step-finding algorithm, and calculation of rates for the first passage model, see [Supporting Material](#).

## RESULTS

### High-resolution single-molecule microscopy enables direct measurement of a one-head-bound intermediate in the stepping cycle of kinesins-1 and -2

To test the hypothesis that kinesin processivity is set by a kinetic race between attachment of the tethered head and detachment of the bound head when the motor is in the one-head-bound (1HB) posthydrolysis state (Fig. 1 A, state 3), we performed high-resolution single-molecule tracking to measure the 1HB duration for multiple kinesins with different processivities. The motors used were wild-type kinesin-1 (K1<sub>14</sub>), kinesin-1 with the NL extended to 17 aa (K1<sub>17</sub>), wild-type kinesin-2 (K2<sub>17</sub>), and kinesin-2 with the NL shortened to 14 aa (K2<sub>14</sub>). It was previously shown that extending the NL reduces processivity independent of the motor domain (35–37). For all motors, a 30-nm-diameter gold nanoparticle was bound to the motor domain

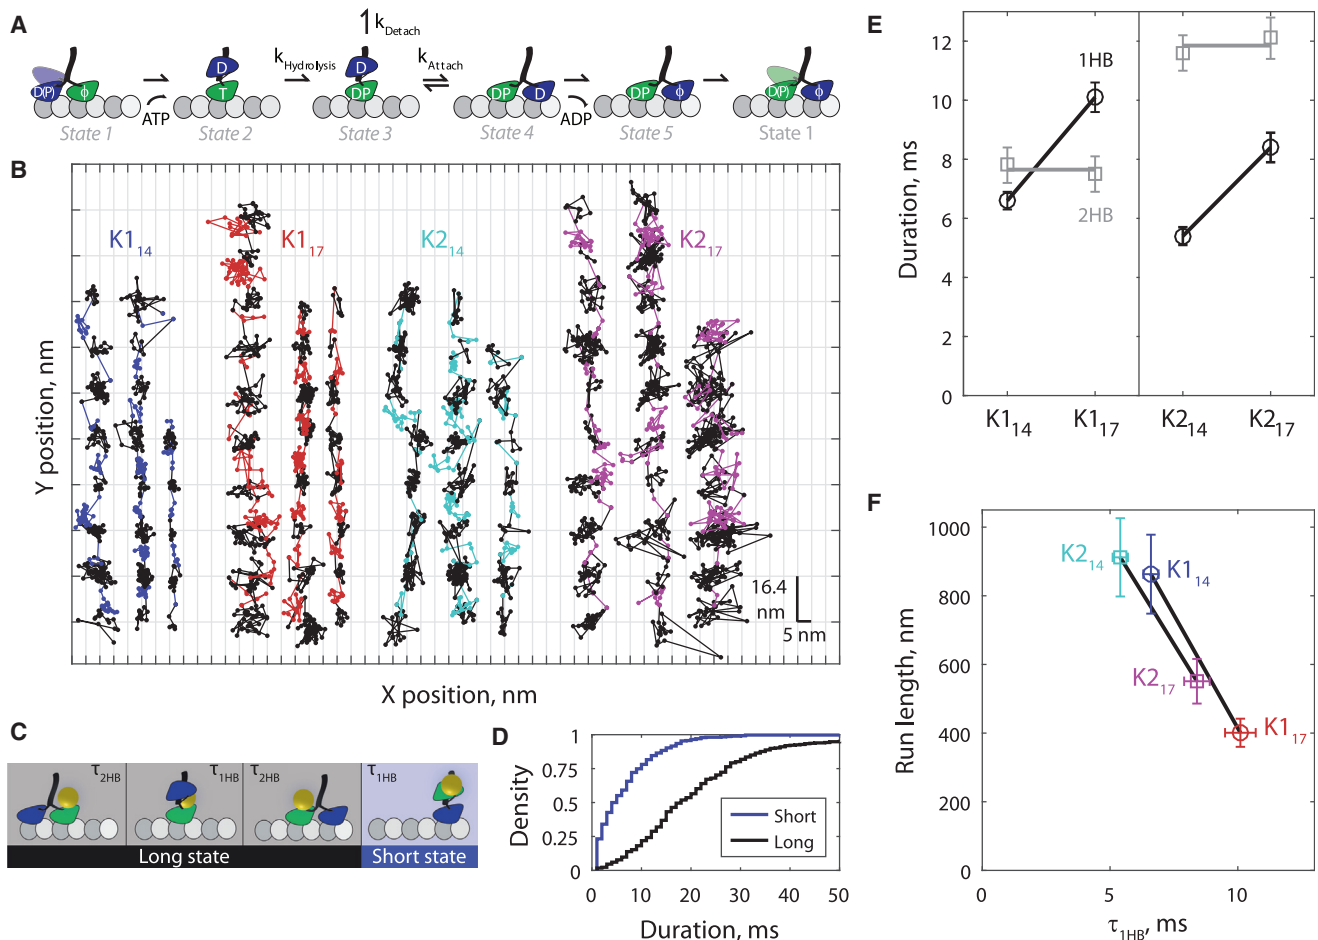

**FIGURE 1** Extending the NL reduces processivity by slowing the tethered head attachment rate. (A) Five-state mechanochemical cycle established in Mickolajczyk et al. (28) and Chen et al. (34), in which processivity is set by a kinetic race between attachment of the tethered (blue) head and detachment of the bound (green) head in the 1HB posthydrolysis state (state 3). Here *T* denotes ATP, *D* denotes ADP, *DP* denotes ADP plus phosphate, and  $\phi$  denotes no nucleotide. (B) Example 1000 frames/s traces of kinesin-1 (K1) and kinesin-2 (K2) motors with 14- and 17-aa NL domains stepping in 2 mM ATP. Horizontal lines denote inferred microtubule binding sites of the nanoparticle-labeled head. Long states on the microtubule (black points) and short states off the microtubule (colored points) corresponding to motor type) were determined by fitting to the (*X*,*Y*,*t*) data (details in Supporting Material). Each data point represents 1 ms. (C) Two-state mechanical model in which each 16.4-nm step is separated into 1HB and 2HB states. Long and short states correspond to black and colored points, respectively, in (B). Note: the terms “long” and “short” refer to duration, not molecular configuration. (D) Distributions of *N* = 370 long states and *N* = 347 short states for K1<sub>14</sub>; see Fig. S2 for other motor distributions. (E) 1HB and 2HB durations showing that for both kinesin-1 and kinesin-2, lengthening the neck linker from 14 to 17 aa increased the 1HB duration and did not change the 2HB duration. Values were calculated from means of long and short state distributions. Error bars represent propagated error from the SE of long and short state distributions. (F) Run length is negatively correlated with 1HB duration for both kinesin-1 and -2, indicating that motors with long NL have reduced processivity due to a reduced  $k_{\text{Attach}}$ . Colors denoting motor type correspond to (B). To see this figure in color, go online.

using biotin-streptavidin (see Materials and Methods), a technique that has been shown both experimentally (28,30) and theoretically (40) to have little influence on stepping. The motors were observed in an *in vitro* single-molecule stepping assay under total internal reflection dark field microscopy at 1000 frames per s in 2 mM ATP. Example position versus time traces for the four kinesin constructs, obtained by fitting point spread functions of gold nanoparticles moving along microtubules (39,41), are shown in Fig. 1 B. Kinesin-1 with a single motor domain tagged has previously been shown to take 16.4 nm hand-over-hand steps (42–44), and we recently established that

at saturating ATP, a one-head-bound intermediate can be measured in which the tethered head is displaced  $\sim 8$  nm from its previous binding site (28). Here we clearly observe this intermediate state for all kinesin-1 and -2 constructs tested (Fig. 1 B, colored points). Because only one head is labeled, this short duration intermediate (“short state”; Fig. 1, C and D) represents a single 1HB state. The longer duration intermediate (“long state”), where the labeled motor domain is bound to the microtubule (Fig. 1 B, black points), represents the two-head-bound (2HB) state of the labeled head plus the 1HB and 2HB states of the unlabeled head (Fig. 1 C). To quantify the duration the motors spent in

the long and short states, the  $(X, Y, t)$  data were fit using a hidden Markov model (see *state space diagram* in Fig. S1; and see [Materials and Methods](#) and [Supporting Material](#) for details). From the stepping traces, distributions of at least 300 determinations of each long and short state were built up for each of the four motors studied (K1<sub>14</sub> distributions shown in Fig. 1 D; see Fig. S2 for all distributions). 1HB and 2HB durations were then calculated from long and short distribution sample means (Fig. 1 E). The key result was that for both kinesin-1 and kinesin-2, extending the NL from 14 to 17 aa increased the 1HB duration, while having little effect on the 2HB duration.

### Altering the neck-linker length modulates the processivity of kinesin-1 and -2 by tuning the tethered head attachment rate

We next measured the run lengths (RL) of the four motors using GFP constructs (Fig. 1 F; distributions in Fig. S3). Consistent with previous measurements (35–37), constructs with the same NL length had similar RLs independent of motor domain. Importantly, a strong negative correlation was observed between the 1HB duration and the run length when comparing the 14 to the 17-aa NL construct of each motor type (Fig. 1 F). From the established mechanochemical cycle (Fig. 1 A), the 1HB state includes both a pre- and posthydrolysis state with detachment occurring from the posthydrolysis state (28,33). Therefore, the total 1HB duration (Fig. 1 A states 2 and 3) is:

$$\tau_{1HB} = \frac{1}{k_{Hydrolysis}} + \frac{1}{k_{Attach} + k_{Detach}}.$$

Assuming that the motor rarely returns backward to the 1HB state from the 2HB state (Fig. 1 A state 4 → 3 transition; discussed in detail below), we can derive the probability of stepping as a simple kinetic race between attachment and detachment:

$$P(\text{step}) = \frac{k_{Attach}}{k_{Attach} + k_{Detach}}.$$

Because the probability of stepping is proportional to the run length, and the run length is >50 steps for all the motors investigated here, it follows that  $k_{Attach} \gg k_{Detach}$ . Moreover, the existing evidence (45) indicates that  $k_{Hydrolysis}$  is not significantly affected by NL length. Thus, the difference in the  $\tau_{1HB}$  values for kinesins with the same motor domain but different NL lengths is as follows:

$$\Delta\tau_{1HB} = \tau_{1HB}^{17} - \tau_{1HB}^{14} = \frac{1}{k_{Attach}^{17}} - \frac{1}{k_{Attach}^{14}}.$$

Therefore, the differences in 1HB duration in Fig. 1, E and F are best understood as resulting from differences in  $k_{Attach}$ . It

follows that for both kinesin-1 and -2, extending the NL from 14 to 17 aa reduces processivity by decreasing  $k_{Attach}$ . This result shows that for kinesin-1 and -2,  $k_{Attach}$  is primarily determined by the NL domain and not by the motor domain.

### Pre-steady-state kinetics independently support 1HB duration differences

To measure the effect of NL length on 1HB duration in an independent experimental platform, we performed ATP half-site release experiments for all four motor constructs using stopped-flow. Motors were incubated with microtubules and low concentrations of fluorescent 2'(3')-O-(N-methylanthraniloyl) nucleoside diphosphate (mantNDP) to create a 1HB ATP waiting state with the mantNDP in the tethered head (46–48). The motor-microtubule complexes were then flushed against ATP, enabling the motors to proceed through their 1HB states, and a drop in fluorescence intensity was detected when they released their mantNDP into solution (Fig. 2 A). In the scheme of Fig. 2 A, if a high ATP concentration (fast  $k_{On}^{ATP}$ ) and a low-affinity mantNDP (fast  $k_{Off}^{D^*}$ ) are used, the rate-limiting step in the half-site release process is  $k_{1HB}$ . Importantly, extending the NL was recently shown not to affect the mantNDP release rate from the front head in the 2HB state (Fig. 2 A  $k_{Off}^{D^*}$ ; see Figs. 5E and 7D in (34)). Thus, by

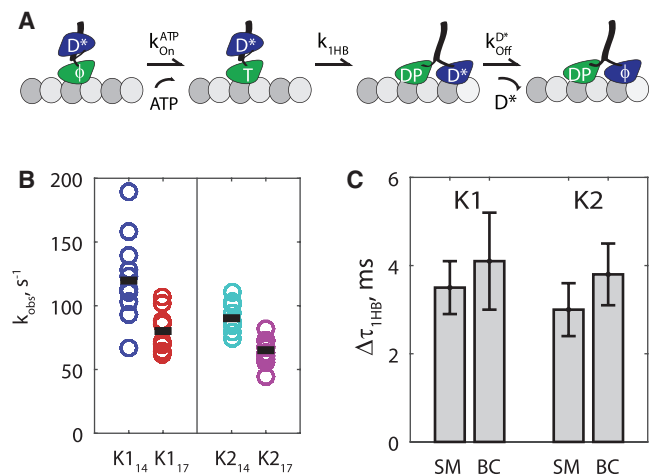

FIGURE 2 Extending the neck linker increases the 1HB duration. (A) The sequence of states in the ATP half-site experiment;  $D^*$  denotes a fluorescent nucleotide. (B) Half-site release rates at 2 mM ATP, measured by fitting fluorescence transients (Fig. S4). Open circles represent 9–11 replicates for each motor, with mean value shown as a black bar. (C) Comparison of differences in the 1HB durations ( $\Delta\tau_{1HB}$ ) between 14- and 17-residue neck-linker constructs for kinesin-1 and kinesin-2 measured by single-molecule (SM) experiments (Fig. 1 E) and biochemical (BC) assays (Fig. 2 B). Error bars denote propagated error from the SE of short state distributions for single-molecule experiments, and from the SE of half-site values for biochemical assays. To see this figure in color, go online.



comparing the half-site release rate of 14- to 17-aa NL constructs, differences in 1HB duration ( $\Delta\tau_{1HB}$ ) can be calculated. Results for half-site release for the four motor constructs are shown in Fig. 2 B (see example transients in Fig. S4). In these experiments mantADP was used for kinesin-1, but due to the high mantADP affinity of kinesin-2 (34), mantGDP was used instead (investigated in detail below). Consistent with previous measurements using different motor constructs (49), elongating the NL was seen to decrease the half-site release rate. The  $\Delta\tau_{1HB}$  measured by half-site was in excellent agreement with the  $\Delta\tau_{1HB}$  measured by single-molecule (Fig. 2 C), providing a second independent line of evidence that extending the NL reduces processivity by reducing the tethered head attachment rate.

### Altering ionic strength modulates the processivity of kinesin-1 and -2 by tuning the bound head detachment rate

We next investigated the effect of reducing the ionic strength on the velocity and run length of all four motor constructs. Each motor was measured in BRB80 (as above in Figs. 1 and 2), and in buffers containing 40, 20, and 12 mM PIPES. Consistent with previous kinesin-1 measurements (36), reducing the ionic strength was seen to slightly decrease the velocity of all motors (Fig. 3 A) and to increase the run lengths of all motors to different extents (Fig. 3 B; distributions in Fig. S3). Under the model that processivity is controlled by a kinetic race between tethered head attachment and bound

head detachment in the 1HB state, an increase in processivity due to an increase in  $k_{Attach}$  must lead to a faster, not a slower velocity. Thus, the measured increase in processivity at low ionic strength more likely stems from a decrease in  $k_{Detach}$ . To test this claim, we measured the microtubule dwell time of all four motors at saturating ADP as a function of ionic strength (Fig. 3 C; see distributions and example kymographs in Fig. S5). Consistent with the prediction that low ionic strength reduces detachment rates, the dwell time increased as the ionic strength was reduced for all four motors. Strikingly, as highlighted when the run lengths (Fig. 3 D) and ADP dwell times (Fig. 3 E) were normalized to their values in BRB80, increases in both parameters were shared by each motor type independent of NL length: K1<sub>14</sub> and K1<sub>17</sub> both had an  $\sim 2.5$ -fold increase in RL and ADP dwell time, whereas K2<sub>14</sub> and K2<sub>17</sub> both had an  $\sim 4$ – $6$ -fold increase in RL and ADP dwell time. Thus,  $k_{Detach}$  can be adjusted by altering the electrostatic interactions between the motor domain and the microtubule, and tuning  $k_{Detach}$  is a means of controlling RL in an approximately proportional fashion. The fact that elongating the NL did not affect the ADP dwell time bolsters the claim that changes in RL due to differences in NL length stem from changes in  $k_{Attach}$ .

### Slowing the ADP off-rate modulates processivity by shunting the motor backward into the 1HB state

The data in Figs. 1–3 establish that kinesin-1 and-2 processivity can be understood as a kinetic race between  $k_{Attach}$

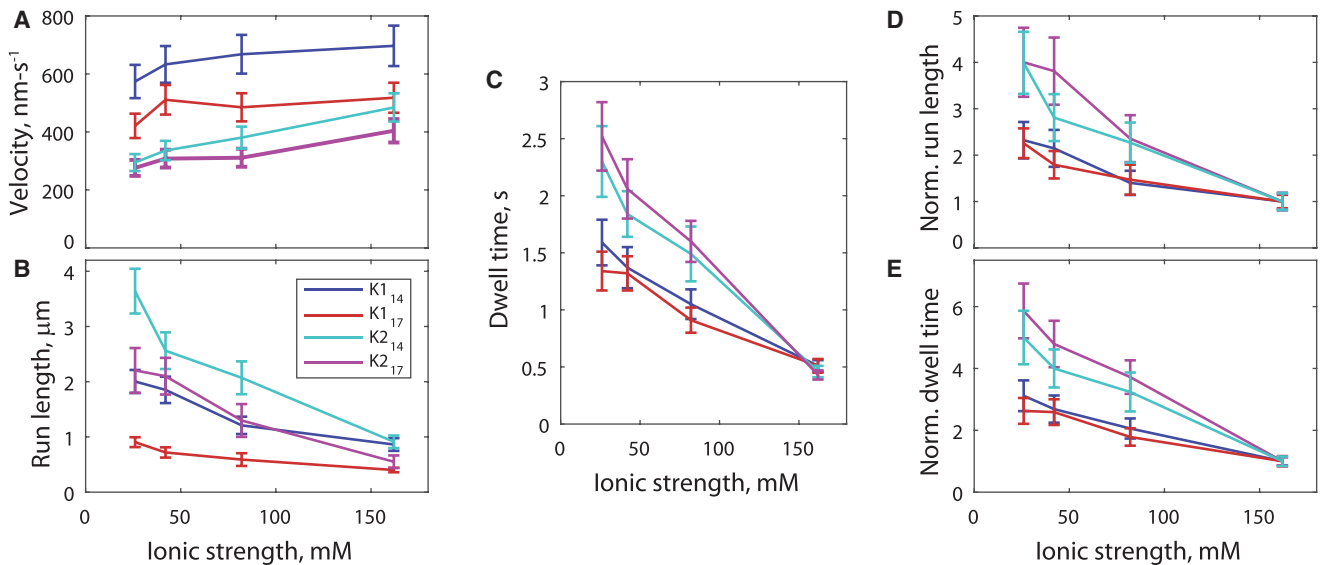

FIGURE 3 Ionic strength alters processivity by tuning the detachment rate from the 1HB vulnerable state. (A) Velocities in 2 mM ATP, (B) run lengths in 2 mM ATP, and (C) dwell times in 2 mM ADP for GFP motors in BRB12, BRB20, BRB40, and BRB80 buffers. Velocities are shown as mean  $\pm$  SE with a 10% error added for  $\sim 1^\circ\text{C}$  variability in temperature (61). Run lengths and dwell times were determined by distribution fitting with error bars determined by bootstrapping (52). (D) Run lengths and (E) ADP dwell times normalized to BRB80 values (with propagated error) to emphasize the pairing by motor domain rather than by neck-linker length. All panels are color-coded by legend in (B), consistent with Figs. 1 and 2. To see this figure in color, go online.

and  $k_{\text{Detach}}$  when the motor is in the vulnerable 1HB state (Fig. 4 A, state 2). However, completion of a forward step also involves ADP release to lock in the gains made by the attachment step. Hence, there is a second kinetic race after tethered head attachment—either ADP is released to complete the step, or the attachment step is reversed and the motor returns to the vulnerable 1HB state (Fig. 4 A, state 3  $\rightarrow$  4 versus 3  $\rightarrow$  2 transition). Depending on the relative kinetic parameters, this process can be described in two ways. In a “first passage model”,  $k_{\text{Attach}}$  is relatively slow and ADP release follows rapidly such that the motor rarely reverts to the 1HB state. In this sense, tethered head attachment is the irreversible ratcheting step. Alternatively, in a “rapid equilibrium model”, both  $k_{\text{Attach}}$  and the reverse rate  $k_{\text{Detach}}^{\text{FH}}$  are very fast, and the equilibrium favors the 1HB state sufficiently that it is detected in single-molecule tracking (28). Here, the rare outpacing of  $k_{\text{Detach}}^{\text{FH}}$  by  $k_{\text{Off}}^{\text{ADP}}$  locks the motor into the 2HB state (Fig. 4 A, equilibrium between states 2 and 3 until the 3  $\rightarrow$  4 transition occurs), and ADP release is thus the irreversible ratcheting step. To test between these models, we measured the run lengths of our four GFP constructs in mantATP. Although the off-rates for mant- and cold ADP are similar for kinesin-1 (Fig. 4 B; Fig. S6 A) (28), kinesin-2 has a 15-fold lower off-rate for mantADP than cold ADP (Fig. 4 B) (34). Thus, under the first passage model the kinesin-2 RL should drop only slightly in mantADP, whereas under the rapid equilibrium model the kinesin-2 RL should drop  $\sim$ 15-fold in mantATP. We found that in mantATP the RL of K2<sub>14</sub> and K2<sub>17</sub> only dropped roughly twofold, thus ruling out the rapid equilibrium model (Fig. 4 C, distributions in Fig. S6 B). As expected from the similarity in their ADP and mantADP off-rates, the

K1<sub>14</sub> and K1<sub>17</sub> RLs were not measurably different in mantATP versus cold ATP.

To ensure quantitative consistency of the first passage model, we modeled the six-state process shown in Fig. 4 A as a Markov chain. We solved for  $k_{\text{Attach}}$  and  $k_{\text{Detach}}$  using our cold ATP RL and  $\Delta\tau_{1\text{HB}}$  values (Figs. 1 A and 2 C), used literature values for  $k_{\text{Off}}^{\text{ADP}}$  or  $k_{\text{Off}}^{\text{mantADP}}$  (28,34), and used measured values for  $k_{\text{Detach}}^{\text{ADP}}$  (Fig. 3 C; and see Table S1 and Supporting Material for details). Using transition probabilities calculated from the rate constants, we determined the run length by calculating the average number of times the motor entered the ATP waiting state before detaching (Fig. 4 A state 6). Comparing the modeled mantATP versus cold ATP RL (changing only  $k_{\text{Off}}^{\text{ADP}}$  to  $k_{\text{Off}}^{\text{mantADP}}$  as in Fig. 4 B), we were able to nearly perfectly replicate the experimental data (Fig. 4 C), validating the first passage model. Hence in physiological ATP, tethered head attachment is the ratcheting step of the cycle and locking-in steps via ADP release occurs with nearly 100% probability.

## DISCUSSION

By changing the identity of the motor domain, the length of the NL domain, the ionic strength of the solvent, and the nucleotide off-rate, we demonstrate here that kinesin processivity can be quantitatively described as a kinetic race between tethered head attachment and bound head detachment. This model should generalize to N-terminal kinesins beyond kinesin-1 and -2, and it provides a quantitative framework for understanding how small structural differences between isoforms can tune rates in the ATPase cycle to yield functional differences in motor behavior.

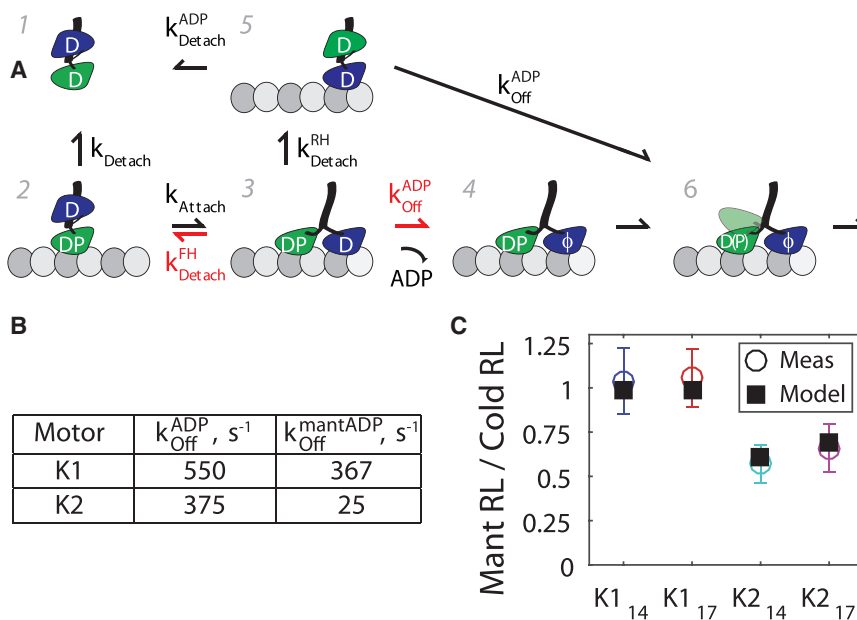

FIGURE 4 Tethered head attachment follows a first passage model. (A) Mechanochemical model based on Fig. 1 A, showing allowed transitions. When ADP release (state 3  $\rightarrow$  4) is significantly slowed, front-head (FH) or rear-head (RH) detachment from state 3 may occur, forcing kinetic flux into vulnerable states (2,5). In the first passage model,  $k_{\text{Detach}}^{\text{FH}}$  is small relative to  $k_{\text{Off}}^{\text{ADP}}$ , whereas in the rapid equilibrium model,  $k_{\text{Detach}}^{\text{FH}}$  is very fast relative to  $k_{\text{Off}}^{\text{ADP}}$  (red arrows). (B) Previous determinations of  $k_{\text{Off}}^{\text{ADP}}$  by front-head nucleotide exchange experiments for kinesin-1 (28) and kinesin-2 (34). These rates are independent of neck-linker length (34). (C) Run lengths in mantATP relative to run lengths in unlabeled (cold) ATP for each motor. Consistency of experiment and model (black squares) supports first passage model for  $k_{\text{Attach}}$ . To see this figure in color, go online.

### Elongating the neck-linker tunes processivity by changing the tethered head attachment rate

Elongating the NL has been previously shown to reduce processivity (36,37,43,49), but the underlying mechanism has remained mysterious. Using high-resolution tracking and stopped-flow, we show here that NL mutants alter the vulnerable state duration, and that independent of motor domain there is a strong negative correlation between vulnerable state duration and processivity (Fig. 1 F). Recent gold-nanoparticle tracking results from Isojima et al. (30) showed that human kinesin-1, with cys-lite modifications in 12 mM PIPES buffer containing saturating ATP, had an increased 1HB duration when the NL was shortened to 13 aa, and slightly decreased duration when the NL was increased to 20 aa (six-glycine insert). However, kinesins with a 13-aa NL have a reduced run length (37) and Cys-lite mutants with various 20-aa NLs have a surprisingly increased run length (50). Hence, their results follow the same negative correlation between vulnerable state duration and processivity. Additionally, our 17-aa NL constructs did not show the unbinding events, sideways steps, or futile hydrolysis (Fig. 1; Fig. S7) that 20-aa NL cys-lite did (30,43), indicating that not all elongated NL constructs should be lumped together for comparison.

One possible explanation for why elongating the NL increases the 1HB duration is that the longer NL increases the conformational search volume of the tethered head. However, an argument against this model is that *Drosophila* kinesin-1 constructs with NLs from 15–20 residues all have roughly the same RL (27,36). A second possibility is that elongating the NL alters the interaction of the tethered head with the bound head while in the 1HB state. Alonso et al. (51) used biochemical and structural data to argue that in the ATP waiting state, the tethered head is nestled next to the bound head, and chemical events in the bound head release the tethered head to step to the next binding site. If extending the NL disrupted the ability of the bound head to free the tethered head, this would increase the measured 1HB duration and time spent in the vulnerable state. A third possibility is that a NL of 14 aa provides the ideal geometry for the tethered head to find its next binding site, perhaps because the docked NL is rigid and any lengthening or shortening of this domain causes misregistration between the tethered head and the next binding site, thereby reducing the attachment rate.

### Electrostatic interactions stabilize the kinesin-microtubule complex in the vulnerable state

We found that adding or subtracting the 3-aa DAL to the NL affected the tethered head attachment rate but not the bound head detachment rate. Thus, kinesins were paired by NL length when observing attachment (Fig. 1) and paired by motor domain when observing detachment (Fig. 3). The bound-head detachment rate was evaluated by proxy using the dwell time in saturating ADP, an approach justified by the close

agreement of the measured  $k_{\text{Detach}}^{\text{ADP}}$  values (Fig. 3 C) with the  $k_{\text{Detach}}$  values calculated from measured RLs and  $\Delta\tau_{1\text{HB}}$  (Table S1). The effect most likely comes from electrostatic interactions between positively charged residues in kinesin and negatively charged residues in the microtubule, particularly in the tubulin C-terminal tail (52). Consistent with this, cleaving off the C-terminal tail with subtilisin has been shown to decrease kinesin processivity (52–54). It is notable that  $k_{\text{Detach}}$  can also be affected by adding positive residues outside the motor domain. Adding lysines to the neck coil has been shown to increase processivity (52). Adding lysines when elongating the kinesin-1 NL has been shown to decrease the run length in BRB80 but not in BRB12 (36,43), a result best understood by offsetting changes in  $k_{\text{Attach}}$  (longer NL) and  $k_{\text{Detach}}$  (ionic strength dependence). We verified this by showing that K1<sub>17</sub> with a lysine (KAL inserted) had a stronger ionic strength dependence of run length and dwell time in ADP than K1<sub>17</sub> without a lysine (DAL inserted; Fig. S8).

### Slowing ADP release reduces processivity by reversing tethered head attachment

When mantATP is used to power kinesin-2 stepping, the slow mantADP release rate increases the probability that the newly bound front head fails to complete its step by releasing its ADP, and instead reverts to the 1HB vulnerable state. This effect only decreases run length approximately twofold (Fig. 4 C), which is surprisingly mild and suggests a first passage model: attachment of the tethered head is the irreversible ratcheting step, and rapid ADP release subsequently locks-in the 1HB to 2HB transition. Our results and model predictions show that kinesin-1 and -2 both rectify steps with nearly 100% efficiency in cold ATP, meaning that the vulnerable state is only entered once per cycle the majority of the time. In Fig. 4, the efficiency of capturing the forward step was compromised chemically by using a high-affinity nucleotide analog. It can also be compromised mechanically by increasing intramolecular tension: Isojima et al. (30) showed that kinesin-1 with a 13-residue NL occasionally returned to the 1HB state after tapping down on the microtubule-binding site, indicating an increased  $k_{\text{Detach}}^{\text{FH}}$ . Multiple isoforms of kinesin have been shown to undergo one-dimensional diffusion when forced into the ADP state (26,55–58), and some low-processivity kinesins such as MCAK utilize diffusion in the ADP or ADP-Pi state in the cell to perform their role in mitosis (58). It follows that these kinesins have a greatly slowed ADP off-rate (59), such that the efficiency of locking-in steps is reduced and kinetic flux is forced into the 1HB ADP-Pi and ADP states.

### Assisting loads decrease run length by enhancing detachment

This work also provides insights into how external loads alter kinesin processivity. Optical trapping experiments on

wild-type kinesin-1 have shown that hindering loads reduce motor velocity and run length, whereas assisting loads have no effect on velocity but strongly reduce run length (27,33,60). Our results show that either  $k_{\text{Attach}}$  or  $k_{\text{Detach}}$  can affect run length, but of these two only  $k_{\text{Attach}}$  affects velocity. Thus, the decrease in run length under hindering load may result from changes to  $k_{\text{Attach}}$  and  $k_{\text{Detach}}$ , but the decrease in run length under assisting load must result solely from changes to  $k_{\text{Detach}}$ . This makes intuitive sense, as it is not clear how an assisting load would decrease  $k_{\text{Attach}}$ , and assisting loads have been shown to rescue the irregular stepping of mutants (43). It also means that assisting loads must speed  $k_{\text{Detach}}$  to a greater degree than do hindering loads. External loads may also increase the front head or rear head detachment rates from the 2HB state (Fig. 4 A, states 3  $\rightarrow$  2 and 3  $\rightarrow$  5 transitions, respectively), and thus increase the flux into vulnerable states in a fashion similar to mantATP (Fig. 4).

Here we show that processivity, an important biophysical determinant of intracellular function, is set by a kinetic race between attachment of the tethered head and detachment of the bound head when kinesin is in a vulnerable one-head-bound state. This simple and general model provides a link between kinesin structure and function that should apply across the kinesin superfamily in both healthy and disease states.

## SUPPORTING MATERIAL

Supporting Materials and Methods, eight figures, and one table are available at [http://www.biophysj.org/biophysj/supplemental/S0006-3495\(17\)30511-8](http://www.biophysj.org/biophysj/supplemental/S0006-3495(17)30511-8).

## AUTHOR CONTRIBUTIONS

K.J.M. built the total internal reflection dark field microscope, designed experiments, performed experiments, analyzed data, and wrote the article. W.O.H. designed experiments and wrote the article.

## ACKNOWLEDGMENTS

We are grateful to David Arginteanu for his help with protein preparation, the labs of Philipp Kukura, Zev Bryant, and Aaron Hoskins for microscopy advice, Greg Hoepflich for advice on run length measurements, and Scott Chen for his help on solution mantADP-ADP exchange data.

This work was funded by National Institutes of Health (NIH) grant R01 GM076476 to W.O.H.

## SUPPORTING CITATIONS

References (62,63) appear in the [Supporting Material](#).

## REFERENCES

- Vale, R. D., T. S. Reese, and M. P. Sheetz. 1985. Identification of a novel force-generating protein, kinesin, involved in microtubule-based motility. *Cell*. 42:39–50.
- Ray, K., S. E. Perez, ..., L. S. Goldstein. 1999. Kinesin-II is required for axonal transport of choline acetyltransferase in *Drosophila*. *J. Cell Biol.* 147:507–518.
- Hall, D. H., and E. M. Hedgecock. 1991. Kinesin-related gene unc-104 is required for axonal transport of synaptic vesicles in *C. elegans*. *Cell*. 65:837–847.
- Granger, E., G. McNee, ..., P. Woodman. 2014. The role of the cytoskeleton and molecular motors in endosomal dynamics. *Semin. Cell Dev. Biol.* 31:20–29.
- Farina, F., P. Pierobon, ..., G. Cappello. 2013. Kinesin KIFC1 actively transports bare double-stranded DNA. *Nucleic Acids Res.* 41:4926–4937.
- Cole, D. G., D. R. Diener, ..., J. L. Rosenbaum. 1998. *Chlamydomonas* kinesin-II-dependent intraflagellar transport (IFT): IFT particles contain proteins required for ciliary assembly in *Caenorhabditis elegans* sensory neurons. *J. Cell Biol.* 141:993–1008.
- Ou, G., O. E. Blacque, ..., J. M. Scholey. 2005. Functional coordination of intraflagellar transport motors. *Nature*. 436:583–587.
- Chen, Y., and W. O. Hancock. 2015. Kinesin-5 is a microtubule polymerase. *Nat. Commun.* 6:8160.
- Gardner, M. K., M. Zanic, ..., J. Howard. 2011. Depolymerizing kinesins Kip3 and MCAK shape cellular microtubule architecture by differential control of catastrophe. *Cell*. 147:1092–1103.
- Gumy, L. F., D. J. Chew, ..., J. W. Fawcett. 2013. The kinesin-2 family member KIF3C regulates microtubule dynamics and is required for axon growth and regeneration. *J. Neurosci.* 33:11329–11345.
- Sawin, K. E., K. LeGuellec, ..., T. J. Mitchison. 1992. Mitotic spindle organization by a plus-end-directed microtubule motor. *Nature*. 359:540–543.
- Waitzman, J. S., and S. E. Rice. 2014. Mechanism and regulation of kinesin-5, an essential motor for the mitotic spindle. *Biol. Cell*. 106:1–12.
- Cross, R. A., and A. McAinsh. 2014. Prime movers: the mechanochemistry of mitotic kinesins. *Nat. Rev. Mol. Cell Biol.* 15:257–271.
- Hirokawa, N., and R. Takemura. 2004. Kinesin superfamily proteins and their various functions and dynamics. *Exp. Cell Res.* 301:50–59.
- Miki, H., Y. Okada, and N. Hirokawa. 2005. Analysis of the kinesin superfamily: insights into structure and function. *Trends Cell Biol.* 15:467–476.
- Tanaka, Y., and N. Hirokawa. 2002. Mouse models of Charcot-Marie-Tooth disease. *Trends Genet.* 18:S39–S44.
- Reid, E., M. Kloos, ..., D. A. Marchuk. 2002. A kinesin heavy chain (KIF5A) mutation in hereditary spastic paraplegia (SPG10). *Am. J. Hum. Genet.* 71:1189–1194.
- Klebe, S., A. Lossos, ..., G. Stevanin. 2012. KIF1A missense mutations in SPG30, an autosomal recessive spastic paraplegia: distinct phenotypes according to the nature of the mutations. *Eur. J. Hum. Genet.* 20:645–649.
- Stokin, G. B., and L. S. B. Goldstein. 2006. Linking molecular motors to Alzheimer's disease. *J. Physiol. Paris*. 99:193–200.
- Hirokawa, N., and R. Takemura. 2004. Molecular motors in neuronal development, intracellular transport and diseases. *Curr. Opin. Neurobiol.* 14:564–573.
- Rath, O., and F. Kozielski. 2012. Kinesins and cancer. *Nat. Rev. Cancer*. 12:527–539.
- Sakowicz, R., J. T. Finer, ..., K. W. Wood. 2004. Antitumor activity of a kinesin inhibitor. *Cancer Res.* 64:3276–3280.
- Kashina, A. S., R. J. Baskin, ..., J. M. Scholey. 1996. A bipolar kinesin. *Nature*. 379:270–272.
- Endow, S. A., S. Henikoff, and L. Soler-Niedziela. 1990. Mediation of meiotic and early mitotic chromosome segregation in *Drosophila* by a protein related to kinesin. *Nature*. 345:81–83.
- Chen, G. Y., K. J. Mickolajczyk, and W. O. Hancock. 2016. The kinesin-5 chemomechanical cycle is dominated by a two-heads-bound state. *J. Biol. Chem.* 291:20283–20294.



26. Soppina, V., S. R. Norris, ..., K. J. Verhey. 2014. Dimerization of mammalian kinesin-3 motors results in superprocessive motion. *Proc. Natl. Acad. Sci. USA*. 111:5562–5567.
27. Andreasson, J. O., B. Milic, ..., S. M. Block. 2015. Examining kinesin processivity within a general gating framework. *eLife*. 4:e07403.
28. Mickolajczyk, K. J., N. C. Deffenbaugh, ..., W. O. Hancock. 2015. Kinetics of nucleotide-dependent structural transitions in the kinesin-1 hydrolysis cycle. *Proc. Natl. Acad. Sci. USA*. 112:E7186–E7193.
29. Ortega-Arroyo, J., and P. Kukura. 2012. Interferometric scattering microscopy (iSCAT): new frontiers in ultrafast and ultrasensitive optical microscopy. *Phys. Chem. Chem. Phys.* 14:15625–15636.
30. Isojima, H., R. Iino, ..., M. Tomishige. 2016. Direct observation of intermediate states during the stepping motion of kinesin-1. *Nat. Chem. Biol.* 12:290–297.
31. Andrecka, J., Y. Takagi, ..., P. Kukura. 2016. Interferometric Scattering Microscopy for the Study of Molecular Motors., 1st Ed. Elsevier, Amsterdam, the Netherlands.
32. Hancock, W. O., and J. Howard. 1999. Kinesin's processivity results from mechanical and chemical coordination between the ATP hydrolysis cycles of the two motor domains. *Proc. Natl. Acad. Sci. USA*. 96:13147–13152.
33. Milic, B., J. O. L. Andreasson, ..., S. M. Block. 2014. Kinesin processivity is gated by phosphate release. *Proc. Natl. Acad. Sci. USA*. 111:14136–14140.
34. Chen, G.-Y., D. F. J. Argenteanu, and W. O. Hancock. 2015. Processivity of the kinesin-2 KIF3A results from rear head gating and not front head gating. *J. Biol. Chem.* 290:10274–10294.
35. Hoepflich, G. J., A. R. Thompson, ..., C. L. Berger. 2014. Kinesin's neck-linker determines its ability to navigate obstacles on the microtubule surface. *Biophys. J.* 106:1691–1700.
36. Shastry, S., and W. O. Hancock. 2010. Neck linker length determines the degree of processivity in kinesin-1 and kinesin-2 motors. *Curr. Biol.* 20:939–943.
37. Shastry, S., and W. O. Hancock. 2011. Interhead tension determines processivity across diverse N-terminal kinesins. *Proc. Natl. Acad. Sci. USA*. 108:16253–16258.
38. Muthukrishnan, G., Y. Zhang, ..., W. O. Hancock. 2009. The processivity of kinesin-2 motors suggests diminished front-head gating. *Curr. Biol.* 19:442–447.
39. Ruhnnow, F., D. Zwicker, and S. Diez. 2011. Tracking single particles and elongated filaments with nanometer precision. *Biophys. J.* 100:2820–2828.
40. Guo, S.-K., P.-Y. Wang, and P. Xie. 2017. A model of processive movement of dimeric kinesin. *J. Theor. Biol.* 414:62–75.
41. Yildiz, A., J. N. Forkey, ..., P. R. Selvin. 2003. Myosin V walks hand-over-hand: single fluorophore imaging with 1.5-nm localization. *Science*. 300:2061–2065.
42. Yildiz, A., M. Tomishige, ..., P. R. Selvin. 2004. Kinesin walks hand-over-hand. *Science*. 303:676–678.
43. Yildiz, A., M. Tomishige, ..., R. D. Vale. 2008. Intramolecular strain coordinates kinesin stepping behavior along microtubules. *Cell*. 134:1030–1041.
44. Toprak, E., A. Yildiz, ..., P. R. Selvin. 2009. Why kinesin is so processive. *Proc. Natl. Acad. Sci. USA*. 106:12717–12722.
45. Dogan, M. Y., S. Can, ..., A. Yildiz. 2015. Kinesin's front head is gated by the backward orientation of its neck linker. *Cell Reports*. 10:1967–1973.
46. Ma, Y. Z., and E. W. Taylor. 1997. Interacting head mechanism of microtubule-kinesin ATPase. *J. Biol. Chem.* 272:724–730.
47. Brendza, K. M., C. A. Sontag, ..., S. P. Gilbert. 2000. A kinesin mutation that uncouples motor domains and desensitizes the  $\gamma$ -phosphate sensor. *J. Biol. Chem.* 275:22187–22195.
48. Hackney, D. D. 2002. Pathway of ADP-stimulated ADP release and dissociation of tethered kinesin from microtubules. Implications for the extent of processivity. *Biochemistry*. 41:4437–4446.
49. Hackney, D. D., M. F. Stock, ..., R. A. Patterson. 2003. Modulation of kinesin half-site ADP release and kinetic processivity by a spacer between the head groups. *Biochemistry*. 42:12011–12018.
50. Clancy, B. E., W. M. Behnke-Parks, ..., S. M. Block. 2011. A universal pathway for kinesin stepping. *Nat. Struct. Mol. Biol.* 18:1020–1027.
51. Alonso, M. C., D. R. Drummond, ..., R. A. Cross. 2007. An ATP gate controls tubulin binding by the tethered head of kinesin-1. *Science*. 316:120–123.
52. Thorn, K. S., J. A. Ubersax, and R. D. Vale. 2000. Engineering the processive run length of the kinesin motor. *J. Cell Biol.* 151:1093–1100.
53. Wang, Z., and M. P. Sheetz. 2000. The C-terminus of tubulin increases cytoplasmic dynein and kinesin processivity. *Biophys. J.* 78:1955–1964.
54. Lakämper, S., and E. Meyhöfer. 2005. The E-hook of tubulin interacts with kinesin's head to increase processivity and speed. *Biophys. J.* 89:3223–3234.
55. Okada, Y., and N. Hirokawa. 1999. A processive single-headed motor: kinesin superfamily protein KIF1A. *Science*. 283:1152–1157.
56. Chandra, R., S. A. Endow, and E. D. Salmon. 1993. An N-terminal truncation of the NCD motor protein supports diffusional movement of microtubules in motility assays. *J. Cell Sci.* 104 (Pt 3):899–906.
57. Hunter, A. W., M. Caplow, ..., J. Howard. 2003. The kinesin-related protein MCAK is a microtubule depolymerase that forms an ATP-hydrolyzing complex at microtubule ends. *Mol. Cell*. 11:445–457.
58. Helenius, J., G. Brouhard, ..., J. Howard. 2006. The depolymerizing kinesin MCAK uses lattice diffusion to rapidly target microtubule ends. *Nature*. 441:115–119.
59. Friel, C. T., and J. Howard. 2011. The kinesin-13 MCAK has an unconventional ATPase cycle adapted for microtubule depolymerization. *EMBO J.* 30:3928–3939.
60. Andreasson, J. O. L., S. Shastry, ..., S. M. Block. 2015. The mechanochemical cycle of mammalian kinesin-2 KIF3A/B under load. *Curr. Biol.* 25:1166–1175.
61. Nara, I., and S. Ishiwata. 2006. Processivity of kinesin motility is enhanced on increasing temperature. *Biophysics (Nagoya-shi)*. 2:13–21.
62. Chen, Y., N. C. Deffenbaugh, ..., W. O. Hancock. 2014. Molecular counting by photobleaching in protein complexes with many subunits: best practices and application to the cellulose synthesis complex. *Mol. Biol. Cell*. 25:3630–3642.
63. Viterbi, A. 1967. Error bounds for convolutional codes and an asymptotically optimum decoding algorithm. *IEEE Trans. Inf. Theory*. 13:260–269.

**Biophysical Journal, Volume 112**

**Supplemental Information**

**Kinesin Processivity Is Determined by a Kinetic Race from a Vulnerable  
One-Head-Bound State**

**Keith J. Mickolajczyk and William O. Hancock**

## SI Text

### Hidden Markov Model for fitting short and long states in high resolution (X,Y,t) data

Nanometric (X,Y) position versus time data returned from point spread function fitting to gold nanoparticle movies were fit with a Hidden Markov Model (HMM) in order to determine points of state transition between the long state on the microtubule binding sites (16.4 nm intervals) and the short state in between the microtubule binding sites. First, the X,Y data were rotated to minimize standard deviation in the X direction, thus aligning Y with the microtubule axis. Next, the experimental noise in Y,  $\sigma$ , was determined using the pair wise differences method described previously (28, 62). Then, the tDetector model-free step-finding algorithm (62) was applied to the Y data, and the Y data as a whole were translated to best align the output staircase with an ideal staircase with 8.2 nm spacing. Next, a transition probability matrix was structured using the state space drawn in **Fig. S1**:

$$A = \begin{bmatrix} 1-g & g/3 & g/3 & g/3 & 0 & 0 & 0 & 0 & 0 & 0 & \dots & 0 \\ 0 & 1-g & 0 & g/2 & g/2 & 0 & 0 & 0 & 0 & 0 & \dots & 0 \\ 0 & 0 & 1-g & g/2 & g/2 & 0 & 0 & 0 & 0 & 0 & \dots & 0 \\ 0 & 0 & 0 & 1-g & g & 0 & 0 & 0 & 0 & 0 & \dots & 0 \\ 0 & 0 & 0 & 0 & 0 & 1-g & g/3 & g/3 & g/3 & 0 & \dots & 0 \\ 0 & 0 & 0 & 0 & 0 & 0 & 1-g & 0 & g/2 & g/2 & \dots & 0 \\ 0 & 0 & 0 & 0 & 0 & 0 & 0 & 1-g & g/2 & g/2 & \dots & 0 \\ 0 & 0 & 0 & 0 & 0 & 0 & 0 & 0 & 1-g & g & \dots & 0 \\ \vdots & \ddots & \ddots \end{bmatrix}$$

Where  $g$  is defined as the number of potential 8.2 nm steps in the trace divided by the number of data points in the trace. Row and column indices matched the state numbering in **Fig. S1**. Next, an emission matrix containing parameters for a 2D uncorrelated symmetric Gaussian distribution was structured:

$$B = \begin{bmatrix} 0 & 0 & \sigma \\ 0 & -3\sigma & \sigma \\ 0 & 3\sigma & \sigma \\ 8.2 & 0 & \sigma \\ 16.4 & 0 & \sigma \\ 16.4 & -3\sigma & \sigma \\ 16.4 & 3\sigma & \sigma \\ 24.6 & 0 & \sigma \\ \vdots & \vdots & \vdots \end{bmatrix}$$

Where the first column represents mean Y position values of Gaussian emitters placed according to the diagram in **Fig. S1**, the second column represents mean X position values, and the third column represents standard deviation values. Row indices match the numbering in **Fig. S1**.  $3\sigma$  was used as the minimum detectable positional change in X. The transition matrix A, emission matrix B, and experimental data were then used as input to the Viterbi algorithm (63), which returned the mostly likely sequence of hidden states. Indices of state transition were then used to call boundaries between successive long and short states. Traces had to be split into ~100-200 nm subtraces to be amenable to the HMM fitting algorithm, as a perfect 8.2 nm register in the experimental data was gradually lost over time due to system drift. The model was implemented in MATLAB software (MathWorks).

### Calculation of rate constants for predicting run lengths under first passage model

In order to calculate all the necessary rate constants for modeling run lengths according the model set up in **Fig. 4A**, the following system of equations was solved for each kinesin-1 and kinesin-2 using the cold ATP 1HB duration and GFP run length data:

$$\begin{cases} \tau_{1HB}^{14} = \tau_{Hydrolysis} + \tau_{Attach}^{14} \\ \tau_{1HB}^{17} = \tau_{Hydrolysis} + \tau_{Attach}^{17} \\ RL^{14} = (8.2) \tau_{Detach} / \tau_{Attach}^{14} \\ RL^{17} = (8.2) \tau_{Detach} / \tau_{Attach}^{17} \\ \tau_{Detach} = \tau_{Detach}^{FH} = \tau_{Detach}^{RH} \end{cases}$$

State times  $\tau$  are the inverse of the state exit rate  $k$ , and 8.2 is the distance per transition in nm. These equations assume that extending the neck linker does not affect  $k_{Hydrolysis}$  or  $k_{Detach}$ , the latter of which was shown experimentally in **Fig. 3C**. Solutions to these equations are shown in **Table S1**. The following transition probability matrix was then set up:

$$\mathbf{P} = \begin{bmatrix} 1 & 0 & 0 & 0 & 0 & 0 \\ P_{21} & 0 & P_{23} & 0 & 0 & 0 \\ 0 & P_{32} & 0 & P_{34} & P_{35} & 0 \\ 0 & 0 & 0 & 0 & 0 & 1 \\ P_{51} & 0 & 0 & 0 & 0 & P_{56} \\ 0 & 1 & 0 & 0 & 0 & 0 \end{bmatrix}$$

Where row and column indices correspond to the state numbers in **Fig. 4A**. Transition probabilities were calculated from the rate constants, for example  $P_{34} = k_{Off}^{ADP} / (k_{Detach}^{RH} + k_{Off}^{ADP} + k_{Detach}^{FH})$ . The absorbing state (row and column one) was then removed to create a matrix of transient states  $\mathbf{P}^T$ , and the expected number of time periods the motor spends in each transient state per run was calculated as  $\mathbf{S} = (\mathbf{I} - \mathbf{P}^T)^{-1}$ , where  $\mathbf{I}$  is the identity matrix.  $S_{15}$ , the expected number of time periods the motor spent in the ATP waiting state given that it started in the 1HB post-hydrolysis state, was taken as the processivity, and converted to a run length by multiplying by 8.2 nm. Simulations and all data analysis was done in MATLAB (MathWorks).



## Supplementary Figures

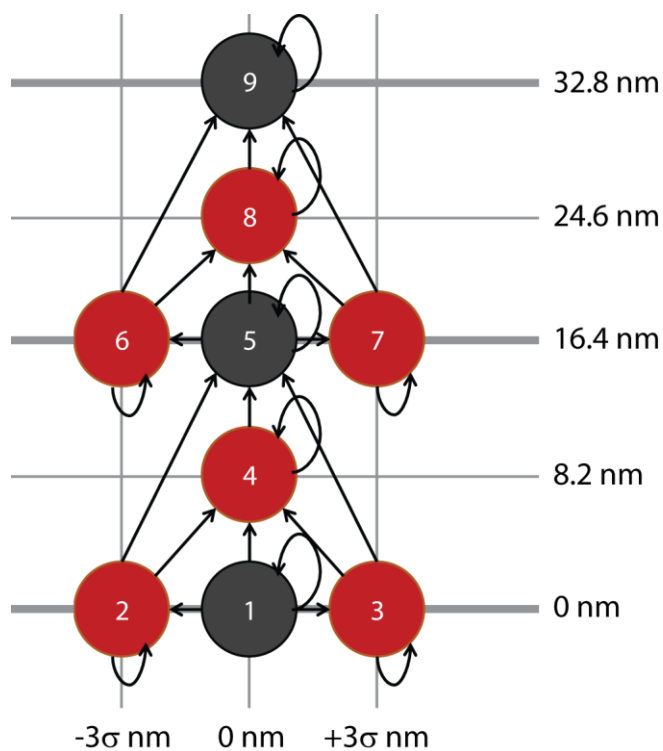

**Fig. S1.** State space diagram for 2D Hidden Markov Model used to fit long and short states in high resolution tracking data. The nanoparticle-labeled motor domain takes full 16.4 nm steps, with  $\sim 8.2$  nm substeps that may or may not have a positional component perpendicular to the microtubule. Long states (where the labelled head is bound to the microtubule) are shown as black circles, and short states (labeled head is off the microtubule) comprise the three red circles in between each long state. Arrows denote potential transitions.  $\sigma$  denotes the standard deviation of the particular trace in plateau regions between stepping events;  $\pm 3\sigma$  is set as the minimum detectable lateral displacement.

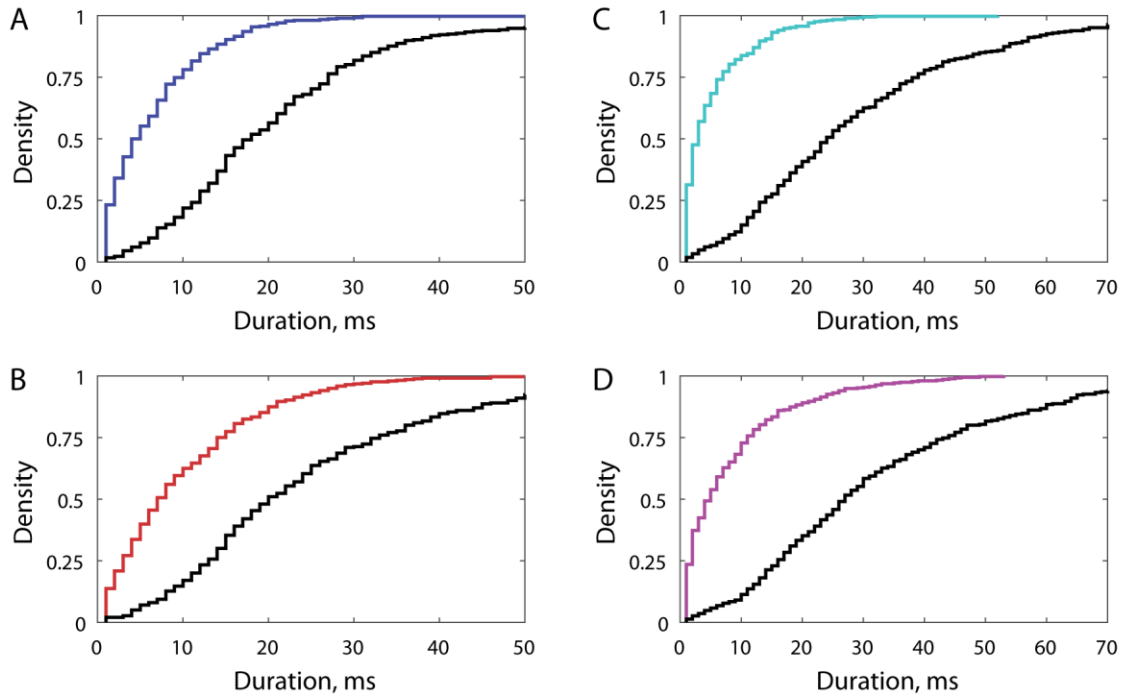

**Fig S2.** Empirical cumulative density functions of long and short states for all motors. **(A)** Distributions of N=336 long states (black) and N=300 short states (blue) for K1<sub>14</sub>. Data come from 44 molecules. **(B)** Distributions of N=336 long states (black) and N=300 short states (red) for K1<sub>17</sub>. Data come from 37 molecules. **(C)** Distributions of N=370 long states (black) and N=326 short states (cyan) for K2<sub>14</sub>. Data come from 47 molecules. **(D)** Distributions of N=349 long states (black) and 310 short states (magenta) for K2<sub>17</sub>. Data comes from 73 molecules.

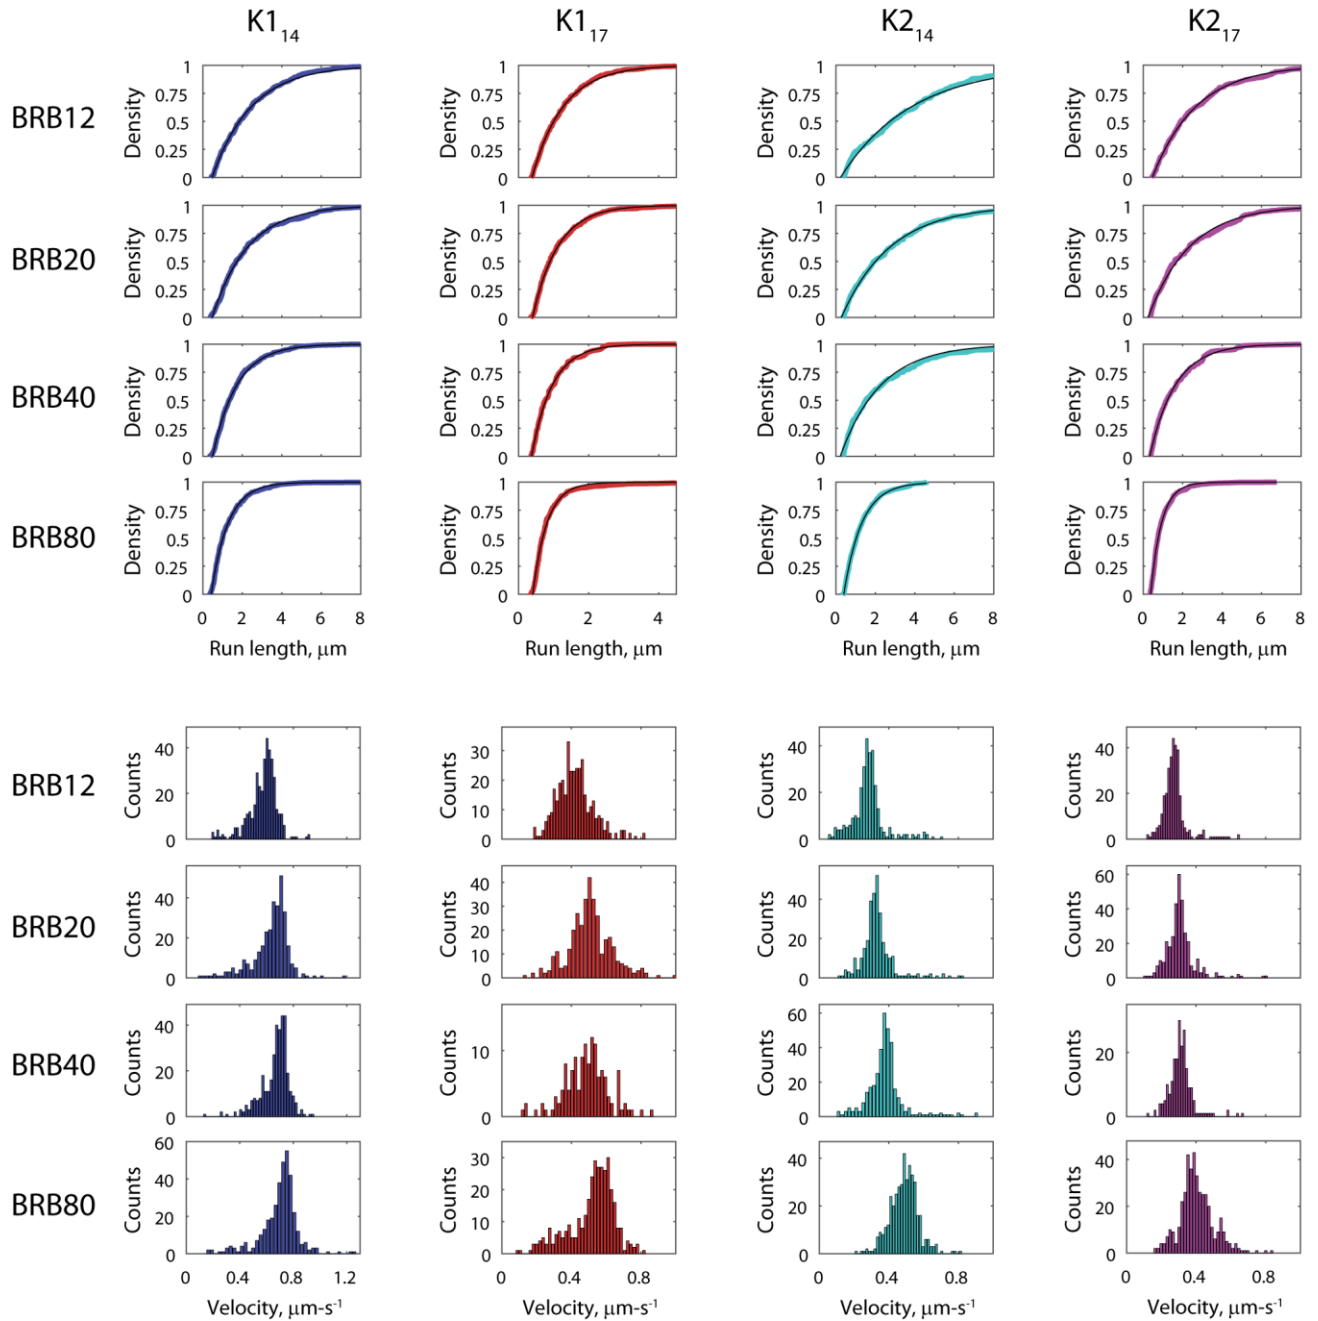

**Fig. S3.** Velocity and run length distributions for four motor constructs at various ionic strengths. Black lines in run length distributions show exponential plus X-offset fits. **Leftmost column** shows K1<sub>14</sub>, with fit run lengths in  $\mu\text{m}$   $2.00 \pm 0.21$  (N=399)  $1.85 \pm 0.24$  (N=322)  $1.21 \pm 0.16$  (N=350), and  $0.86 \pm 0.12$  (N=365); velocity mean values in  $\mu\text{m}\cdot\text{s}^{-1}$   $0.57 \pm 0.06$ ,  $0.63 \pm 0.06$ ,  $0.67 \pm 0.07$ , and  $0.70 \pm 0.07$  for BRB12, BRB20, BRB40, and BRB80, respectively. **Second column** from left shows K1<sub>17</sub>, with fit run lengths in  $\mu\text{m}$   $0.91 \pm 0.09$  (N=364),  $0.72 \pm 0.09$  (N=350),  $0.59 \pm 0.12$  (N=138), and  $0.40 \pm 0.04$  (N=353); velocity mean values in  $\mu\text{m}\cdot\text{s}^{-1}$   $0.42 \pm 0.04$ ,  $0.51 \pm 0.05$ ,  $0.49 \pm 0.05$ , and  $0.52 \pm 0.05$ . **Third column** from left shows K2<sub>14</sub>, with fit run lengths in  $\mu\text{m}$   $3.66 \pm 0.40$  (N=303),  $2.56 \pm 0.33$  (N=308),  $2.07 \pm 0.30$  (N=360), and  $0.91 \pm 0.11$  (N=416); velocity mean values in  $\mu\text{m}\cdot\text{s}^{-1}$   $0.29 \pm 0.03$ ,  $0.33 \pm 0.03$ ,  $0.38 \pm 0.04$ , and  $0.49 \pm 0.05$ . **Rightmost column** shows K2<sub>17</sub>, with fit run lengths in  $\mu\text{m}$   $2.21 \pm 0.32$  (N=321),  $2.10 \pm 0.31$  (N=334),  $1.30 \pm 0.23$  (N=209), and  $0.55 \pm 0.07$  (N=424); velocity mean values in  $\mu\text{m}\cdot\text{s}^{-1}$   $0.28 \pm 0.03$ ,

$0.31 \pm 0.03$ ,  $0.31 \pm 0.03$ , and  $0.40 \pm 0.04$ . Run length errors were obtained by bootstrapping (52), and velocity errors we obtained from the standard error of the mean (SEM) plus a 10% added error for  $1^\circ\text{C}$  temperature fluctuations.

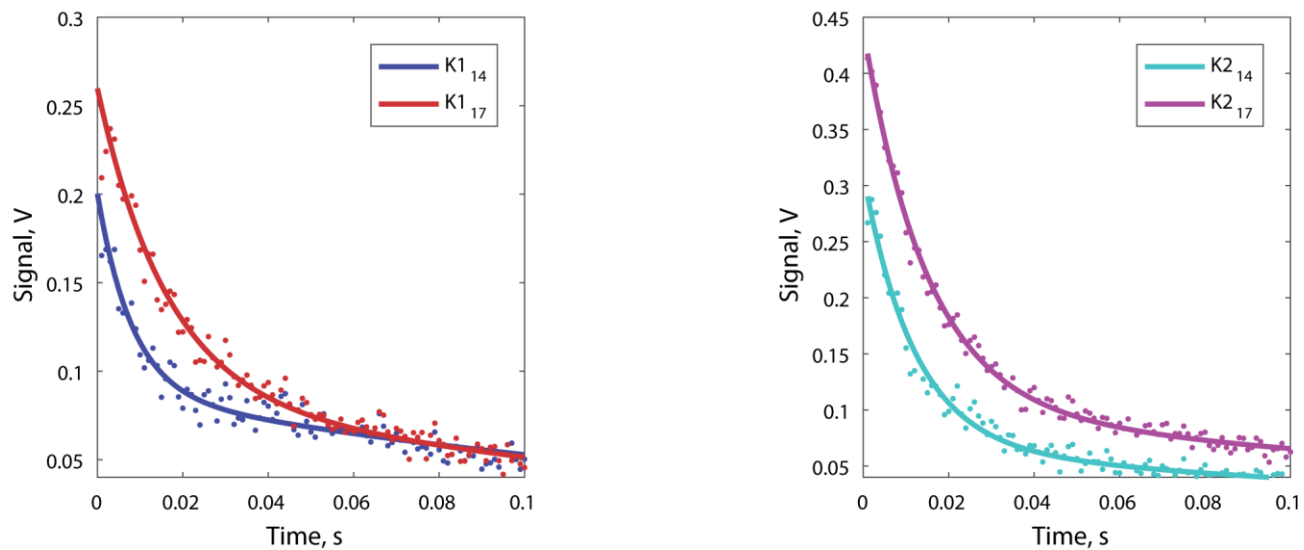

**Fig. S4.** Example ATP half-site transients from stopped-flow spectrofluorometer. Traces show the drop in fluorescence signal associated with release of mantNDP from the motor domain into solution. Kinesin-2 was observed to have a larger fluorescence enhancement for mant nucleotides than kinesin-1. Kinesin-1 traces were carried out with mantADP, while Kinesin-2 traces were carried with mantGDP due to the motor's high mantADP affinity.



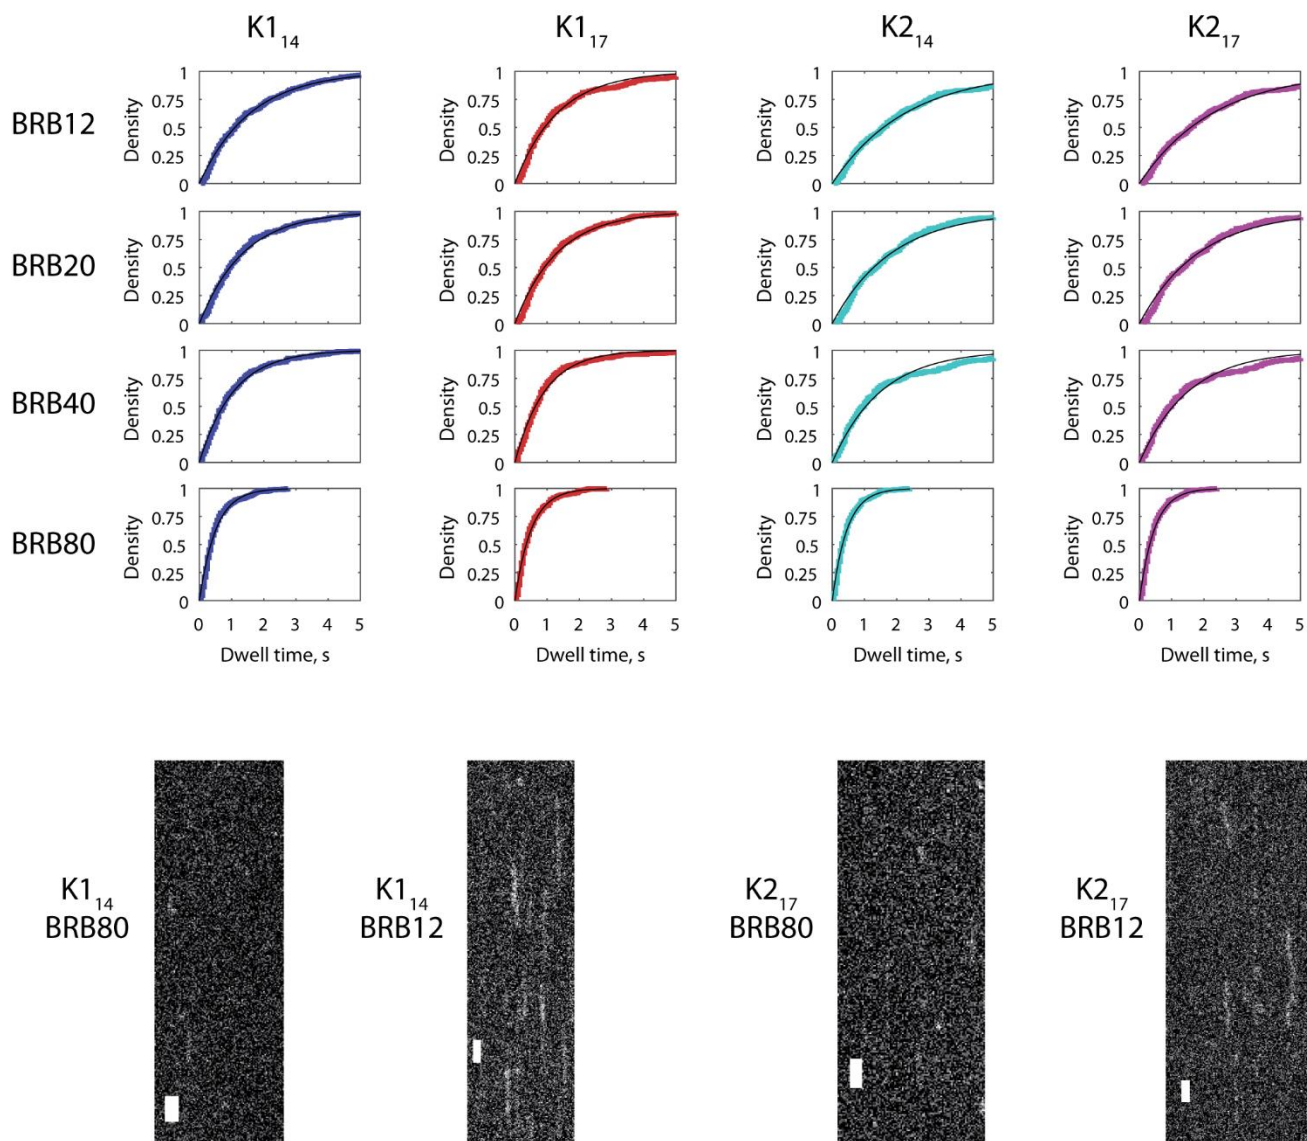

**Fig. S5.** Raw data for microtubule dwell times for four motors in 2 mM ADP, as a function of ionic strength. **Leftmost column** shows  $K1_{14}$  with exponential fits in seconds:  $1.59 \pm 0.20$  ( $N=311$ ),  $1.37 \pm 0.18$  ( $N=305$ ),  $1.05 \pm 0.13$  ( $N=303$ ), and  $0.51 \pm 0.05$  ( $N=326$ ) for BRB12, BRB20, BRB40, and BRB80, respectively. **Second column** from left shows  $K1_{17}$  with exponential fits in seconds:  $1.34 \pm 0.17$  ( $N=310$ ),  $1.32 \pm 0.15$  ( $N=309$ ),  $0.91 \pm 0.11$  ( $N=312$ ), and  $0.51 \pm 0.06$  ( $N=309$ ). **Third column** from left shows  $K2_{14}$  with exponential fits in seconds:  $2.30 \pm 0.31$  ( $N=389$ ),  $1.84 \pm 0.20$  ( $N=303$ ),  $1.52 \pm 0.24$  ( $N=306$ ), and  $0.46 \pm 0.05$  ( $N=303$ ). **Rightmost column** shows  $K2_{17}$  with exponential fits in seconds:  $2.52 \pm 0.30$  ( $N=314$ ),  $2.06 \pm 0.26$  ( $N=305$ ),  $1.60 \pm 0.18$  ( $N=319$ ), and  $0.43 \pm 0.04$  ( $N=311$ ). All errors were determined by bootstrapping(52). Example kymographs (20 frames per second) shown below. All scale bars are 1 second.

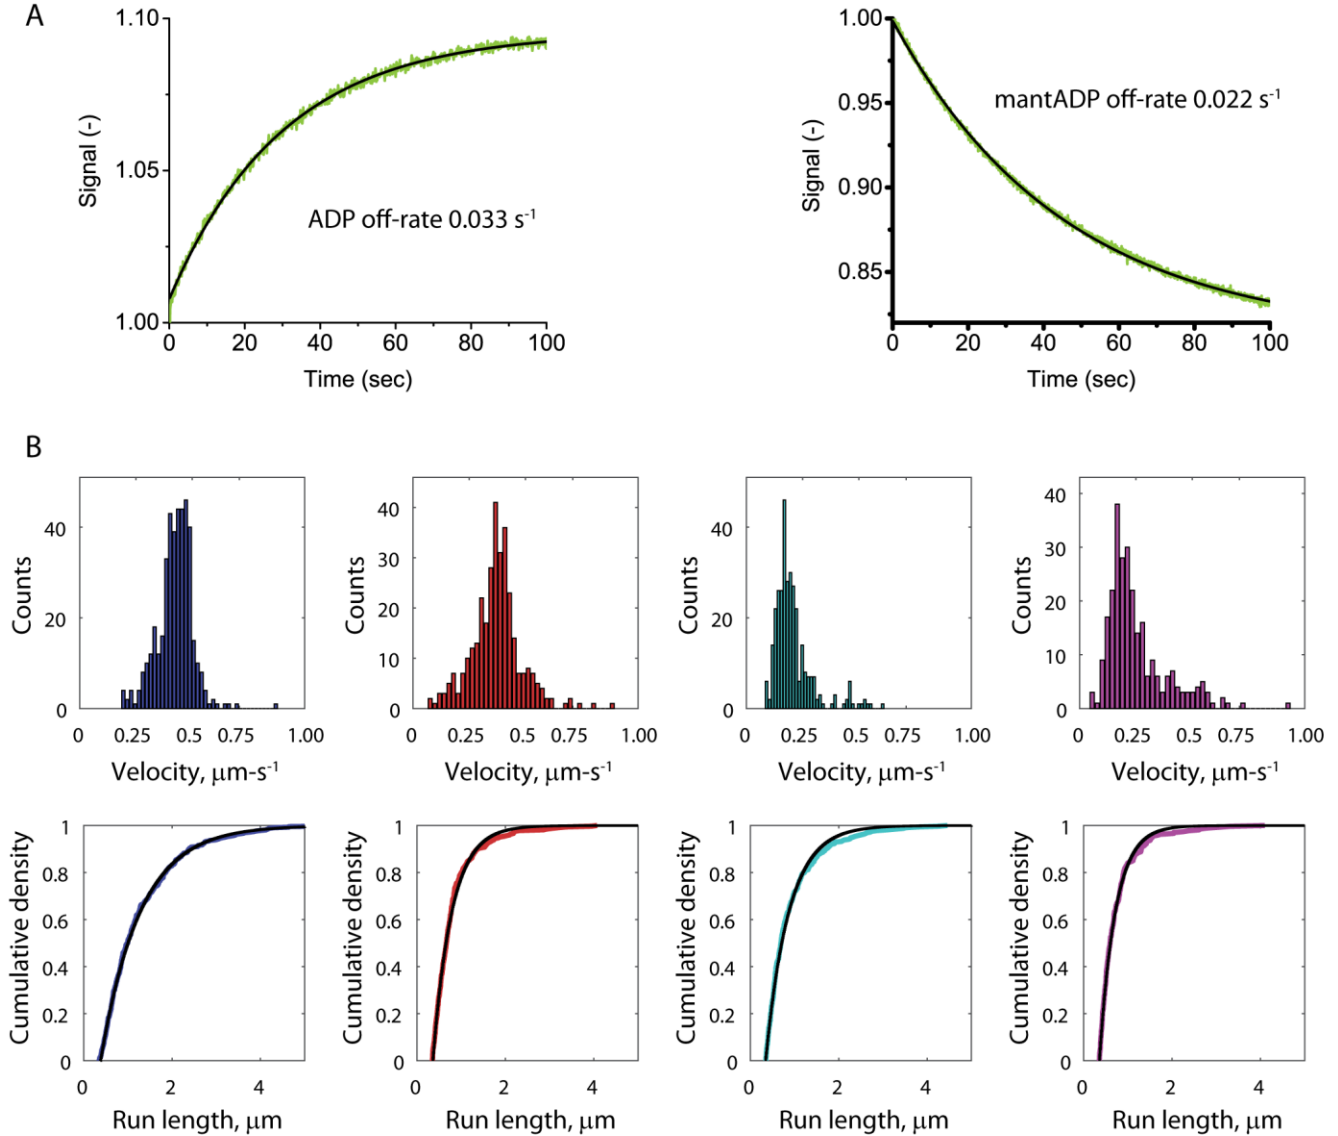

**Fig. S6.** Kinesin-1 solution ADP/mantADP exchange and Kinesin-1 and -2 motor performance in mantATP. **(A)** At left, kinesin-1 motors incubated in cold ADP were flushed against excess mantADP. Data were fit to a rising exponential with rate constant of  $0.033 \text{ s}^{-1}$ , corresponding to the (rate-limiting) off-rate for cold ADP. At right, motors incubated in mantADP were flushed against excess cold ADP. Data were fit by a falling exponential with a rate constant of  $0.022 \text{ s}^{-1}$ , corresponding to the off-rate for mantADP. The similarity in these off-rates demonstrates that kinesin-1 has a similar affinity for mantADP and cold ADP. **(B)** GFP motor run lengths and velocity distributions in mantATP. **Leftmost column** (blue) shows K1<sub>14</sub> velocity  $0.42 \pm 0.04 \mu\text{m}\cdot\text{s}^{-1}$  and run length  $0.90 \pm 0.11 \mu\text{m}$  ( $N=425$ ). **Second column** (red) shows K1<sub>17</sub> velocity  $0.37 \pm 0.04 \mu\text{m}\cdot\text{s}^{-1}$  and run length  $0.52 \pm 0.05 \mu\text{m}$  ( $N=326$ ). **Third column** (cyan) shows K2<sub>14</sub> velocity  $0.21 \pm 0.02 \mu\text{m}\cdot\text{s}^{-1}$  and run length  $0.52 \pm 0.07 \mu\text{m}$  ( $N=325$ ). **Rightmost column** (magenta) shows K2<sub>17</sub> velocity  $0.25 \pm 0.03 \mu\text{m}\cdot\text{s}^{-1}$  and run length  $0.36 \pm 0.06 \mu\text{m}$  ( $N=268$ ). Run length fits (black lines) were to an exponential distribution with X-offset, and errors were obtained by bootstrapping (52). Velocity errors were obtained from the SEM plus a 10% added error due to  $1^\circ\text{C}$  temperature fluctuations.

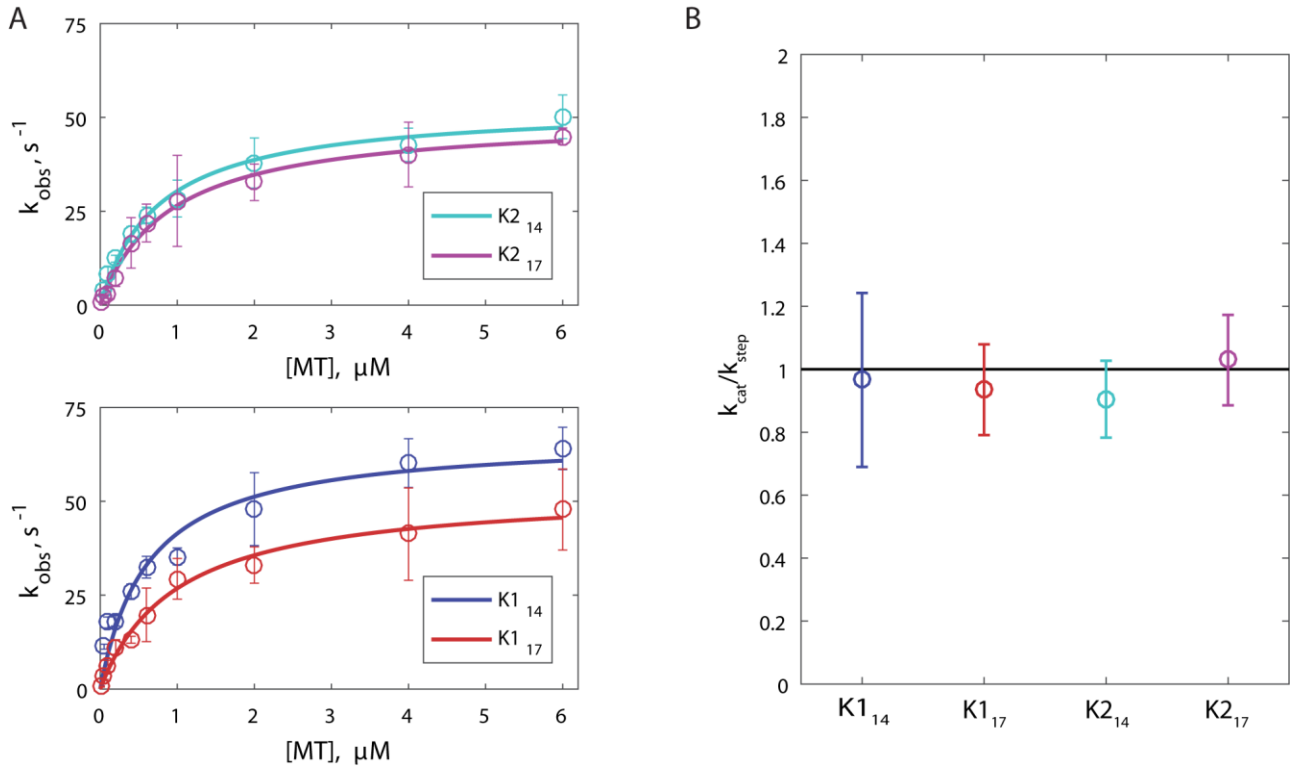

**Fig. S7.** Elongating the neck linker does not disrupt chemomechanical coupling. (A) Solution ATPase rates normalized to the active kinesin concentration as determined by mantADP exchange. All data points show mean plus or minus SEM for  $N=5$  measurements. The  $k_{cat}/K_M$  values for K1<sub>14</sub>, K1<sub>17</sub>, K2<sub>14</sub>, and K2<sub>17</sub> in  $s^{-1}$  and  $\mu M$  are  $67.1 \pm 10.6 / 0.62 \pm 0.32$ ,  $53.1 \pm 5.8 / 0.98 \pm 0.32$ ,  $53.2 \pm 4.3 / 0.75 \pm 0.19$ , and  $50.2 \pm 4.4 / 0.89 \pm 0.24$ , respectively. (B) Fit  $k_{cat}$  values from solution ATPase normalized to motor stepping rates. Stepping rates were determined by the inverse of the sum 1HB and 2HB durations reported in **Fig. 1E**. A value of 1.0 indicates that one ATP turnover event occurs per step. Thus, no motors showed evidence of futile hydrolysis cycles.

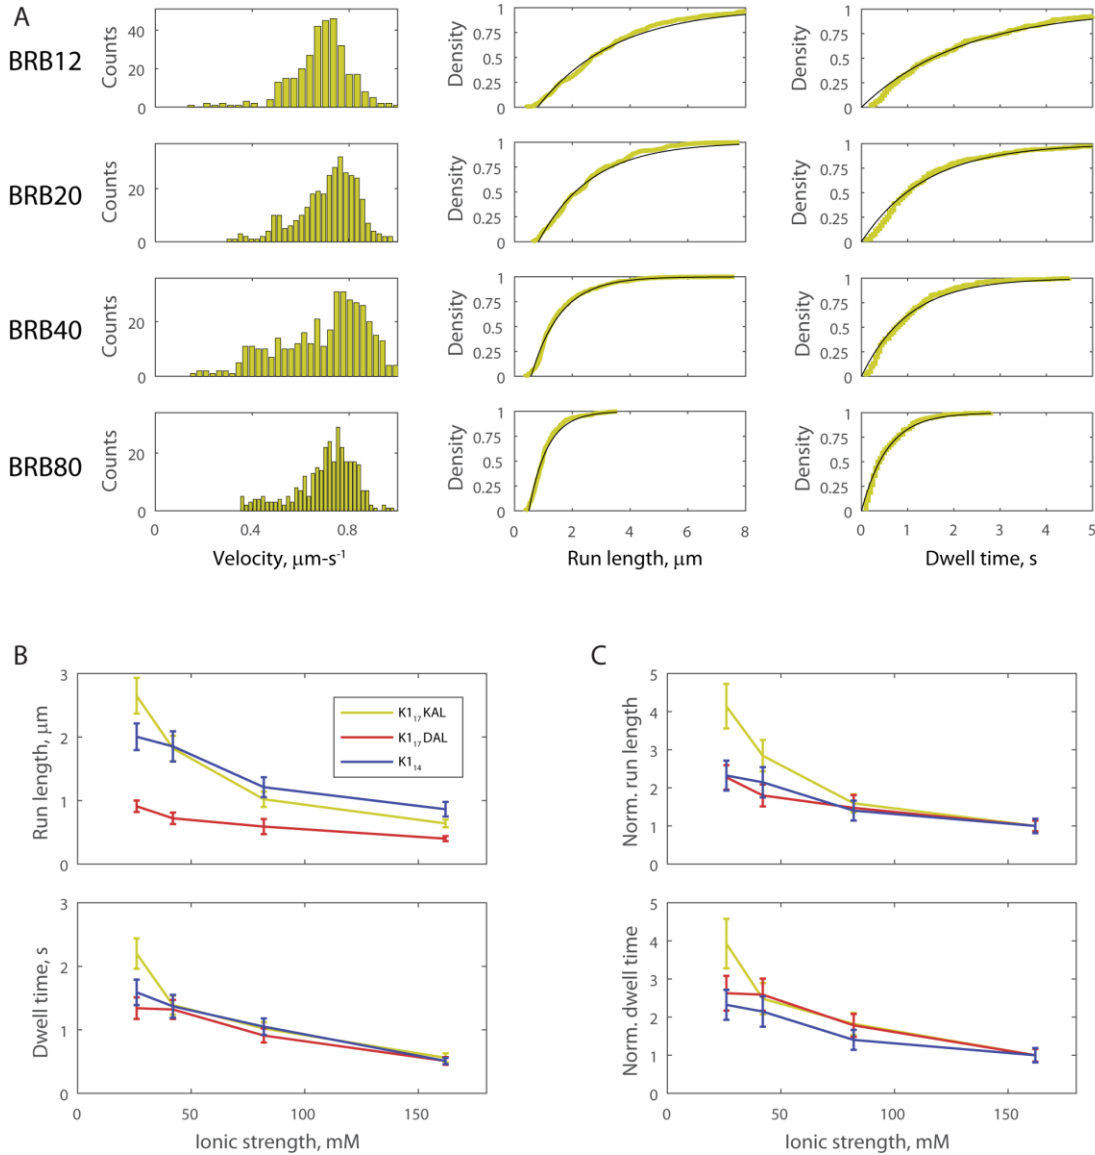

**Fig. S8.** Adding lysines to the neck linker changes the ionic strength dependence of run length through changes to  $k_{\text{Detach}}$ . **(A)** Raw data for kinesin-1 with an extended NL including a lysine ( $K_{17}\text{KAL}$ ) at various ionic strengths. Leftmost column shows velocity distributions in 2 mM ATP, with mean values in  $\mu\text{m}\cdot\text{s}^{-1}$   $0.69\pm 0.07$  ( $N=328$ ),  $0.72\pm 0.07$  ( $N=330$ ),  $0.70\pm 0.07$  ( $N=392$ ), and  $0.70\pm 0.07$  for BRB12, BRB20, BRB40, and BRB80, respectively. Center column shows run length distributions in 2 mM ATP, with fit values in  $\mu\text{m}$   $2.65\pm 0.28$ ,  $1.82\pm 0.20$ ,  $1.02\pm 0.12$ , and  $0.64\pm 0.06$ . Rightmost column shows dwell time distributions in 2 mM ADP, with fit values in s  $2.20\pm 0.24$ ,  $1.39\pm 0.15$ ,  $1.02\pm 0.10$ , and  $0.56\pm 0.07$ . **(B)** Compiled raw data for wildtype kinesin ( $K_{14}$ ) versus kinesin with DAL inserted into the NL ( $K_{17}\text{DAL}$ ) and kinesin with KAL inserted into the NL ( $K_{17}\text{KAL}$ ). At high ionic strength, all three motors have an equal ADP dwell time and thus an equal  $k_{\text{Detach}}$ , but different run length values and thus different  $k_{\text{Attach}}$  values. At low ionic strength,  $K_{17}\text{KAL}$  had a much larger increase in run length and ADP dwell time than  $K_{17}\text{DAL}$  and  $K_{14}$ . This is emphasized in the normalized data **(C)**:  $K_{17}\text{KAL}$  had a 4-fold increase in both values, whereas  $K_{17}\text{DAL}$  and  $K_{14}$  had only a 2.5-fold increase. We propose that this difference in scaling is due to the positive charge on the lysine residue. This difference in scaling means that at low ionic strength,  $K_{17}\text{KAL}$  has a similar run length to  $K_{14}$ —its  $k_{\text{Attach}}$  value is still lower, but its strongly depressed  $k_{\text{Detach}}$  value compensates.



|                           | <b>Kinesin-1</b> | <b>Kinesin-2</b> |
|---------------------------|------------------|------------------|
| $k_{Attach}^{14}, S^{-1}$ | 329.2±291.1      | 218.4±176.4      |
| $k_{Attach}^{17}, S^{-1}$ | 153.0±135.6      | 131.9±106.5      |
| $k_{Detach}, S^{-1}$      | 3.13±2.75        | 1.96±1.57        |
| $k_{Hydrolysis}, S^{-1}$  | 280.7±214.5      | 1,218±5,505      |

**Table S1.** Calculated rate constants used for ADP/mADP processivity model in **Fig 4A**.

## SUPPORTING REFERENCES

28. Mickolajczyk, K. J., Deffenbaugh, N. C., Ortega Arroyo, J., Andrecka, J., Kukura, P., and Hancock, W.O. 2015. Kinetics of nucleotide-dependent structural transitions in the kinesin-1 hydrolysis cycle. *Proc. Natl. Acad. Sci. U. S. A.* 112: E7186–E7193.
52. Thorn, K.S., J.A. Ubersax, and R.D. Vale. 2000. Engineering the processive run length of the kinesin motor. *J. Cell Biol.* 151: 1093–1100.
62. Chen, Y., N.C. Deffenbaugh, C.T. Anderson, and W.O. Hancock. 2014. Molecular counting by photobleaching in protein complexes with many subunits: best practices and application to the cellulose synthesis complex. *Mol. Biol. Cell.* 25: 3630–42.
63. Viterbi, A. 1967. Error bounds for convolutional codes and an asymptotically optimum decoding algorithm. *IEEE Trans. Inf. Theory.* 13: 260–269.
